# Supplementary material for: Biological effects of dosing aerobic exercise and neuromuscular electrical stimulation in rats
Source: PubMed Central journal article supplement (PMC5589775; doi:10.1038/s41598-017-11260-7), 2017-09-07
Supplement: 41598_2017_11260_MOESM1_ESM.pdf [file 41598_2017_11260_MOESM1_ESM.pdf]

## **Biological effects of dosing aerobic exercise and neuromuscular electrical stimulation in rats.**

Stefania Dalise<sup>1,6\*</sup>, Loredana Cavalli<sup>1,6\*</sup>, Harmanvir Ghuman<sup>1,2\*</sup>,  
Brendon Wahlberg<sup>3\*</sup>, Madeline Gerwig<sup>4</sup>, Carmelo Chisari<sup>6</sup>,  
Fabrisia Ambrosio<sup>1,2,5</sup>, Michel Modo<sup>1,2,3, CA</sup>

University of Pittsburgh, <sup>1</sup>McGowan Institute for Regenerative Medicine, <sup>2</sup>Department of Bioengineering, <sup>3</sup>Department of Radiology, <sup>4</sup>Department of Neuroscience, <sup>5</sup>Department of Physical Medicine and Rehabilitation, Pittsburgh, Pennsylvania, USA; <sup>6</sup> University Hospital of Pisa, Department of Neuroscience, Unit of Neurorehabilitation, Pisa, Italy.

\* contributed equally

### **Corresponding Author:**

Dr. Mike Modo

University of Pittsburgh

McGowan Institute for Regenerative Medicine

3025 East Carson St

Pittsburgh, PA 15203

USA

+1 (412) 383 7200

e-mail: [mmm154@pitt.edu](mailto:mmm154@pitt.edu)

## Supplementary Figures

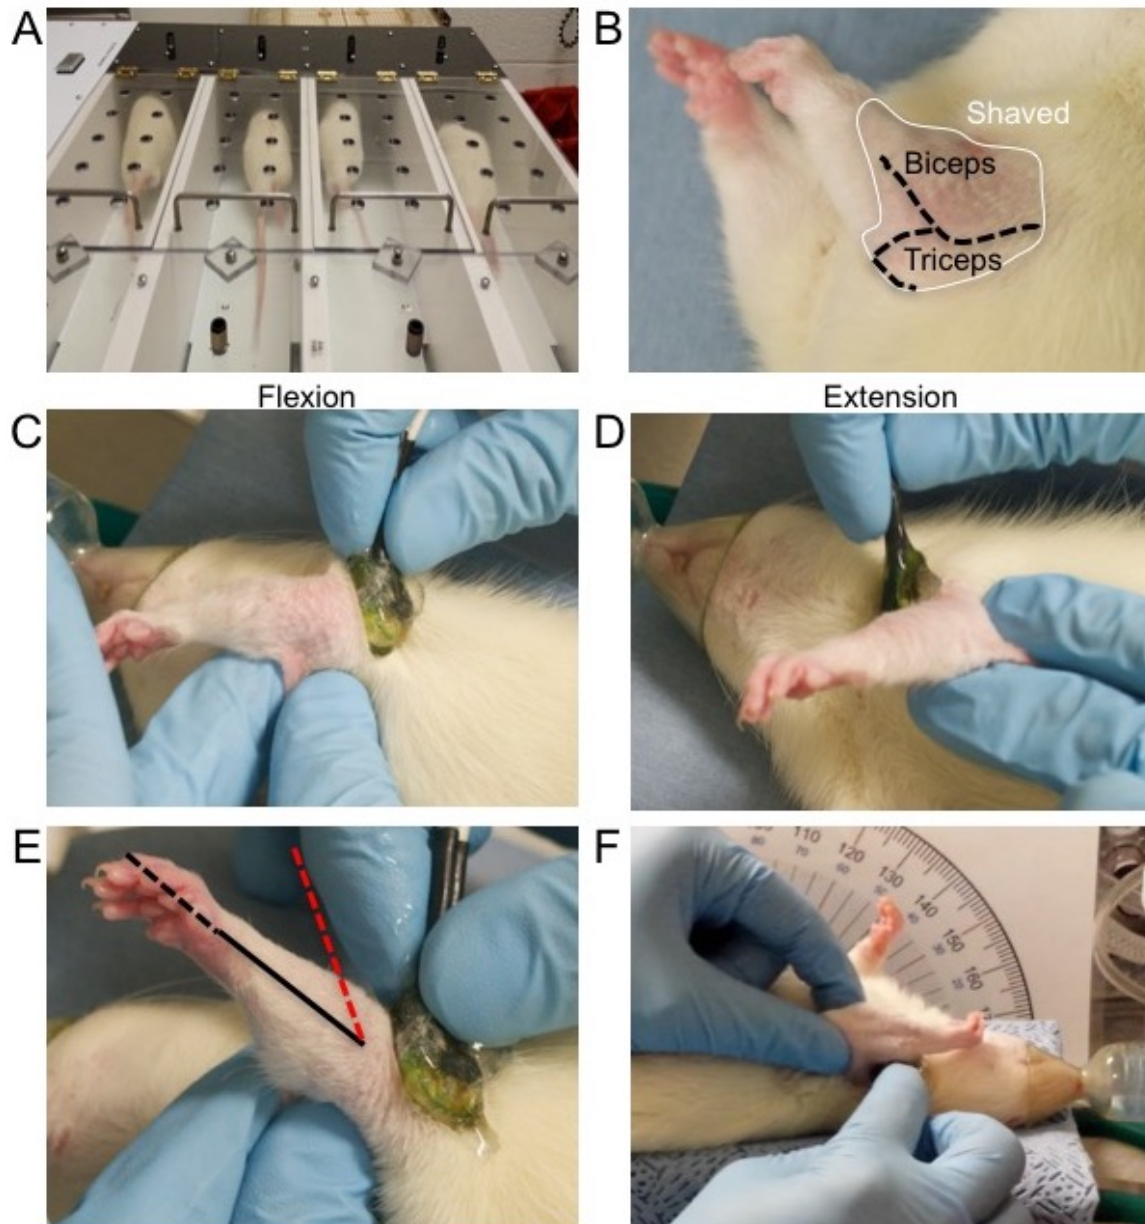

**Supplementary Figure 1.** Aerobic exercise (AE) and neuromuscular stimulation (NMES). **A.** AE was administered using a treadmill that afforded the running of 4 rats simultaneously. The same apparatus was used to evaluate maximum performance capacity of animals. **B.** For NMES, the biceps and triceps were individually stimulated after exposure of the skin by trimming the overlying hair. **C.** Stimulation of the biceps resulted in a flexion of the forelimb. **D.** In contrast, stimulation of the triceps produced an extension of the forearm. **E.** A 30° extension and flexion of the forearm was considered a successful administration of NMES. **F.** A goniometer was used to determine if an appropriate extension and flexion was achieved.
